# Supplementary material for: Magnetic boron nitride adorned with Pd nanoparticles: an efficient catalyst for the reduction of nitroarenes in aqueous media
Source: Royal Society of Chemistry journal article supplement (doi:10.1039/d2dt03920f), 2023-01-01
Supplement: d2dt03920f1.pdf [file d2dt03920f1.pdf]

## Supplementary information

### Magnetic boron nitride adorned with Pd nanoparticles: Efficient catalyst for the reduction of nitroarenes in aqueous media

Jinghan Wang, Woo Seok Cheon, Ju-Yong Lee, Wenqian Yan, Sunghoon Jung<sup>2</sup>, Ho Won Jang\*  
Mohammadreza Shokouhimehr\*

1. Department of Materials Science and Engineering, Research Institute of Advanced Materials, Seoul National University, Seoul, 08826, Republic of Korea.
2. Department of Nano-bio Convergence, Korea Institute of Materials Science, Changwon, 51508, Republic of Korea.

\*Corresponding authors emails: hwjang@snu.ac.kr and mrsh2@snu.ac.kr

## **Experimental**

### **Materials and characterization**

All chemicals used for the synthesis and reactions are commercially procured from commercial companies and used without further purification. Hexagonal boron nitride (h-BN), potassium ferricyanide (III) ( $K_3[Fe(CN)_6]$ ), and potassium palladium(II) chloride ( $K_2PdCl_4$ ) were purchased from Sigma-Aldrich. All other chemicals used in this study were purchased from the Daejung and Samchun chemical companies. The crystallinity of as-prepared h-BN/Pd/Fe<sub>2</sub>O<sub>3</sub> nanocatalyst was characterized using X-ray diffraction (XRD, D8-Advance) using D8-Advance in 2 $\theta$  range of 10-90° with a scan rate of 5°/min. Fourier transform infrared spectroscopy (FT-IR, Nicolet iS50) was obtained in the range of 4000-400 cm<sup>-1</sup>. The morphology of the catalyst was examined using a transmission electron microscope (TEM), a high-resolution TEM (HRTEM) and selected area electron diffraction (SAED, JEOL JEM-2100F) instrument coupled with an energy dispersive spectrometer (EDS).

The surface area of the h-BN/Pd/Fe<sub>2</sub>O<sub>3</sub> catalyst was analyzed using a Brunauer-Emmett-Teller device (BET, Micromeritics 3Flex) with the Barrett-Joyner-Halenda (BJH) method to study the pore size. Inductively coupled plasma-atomic emission spectrometry (ICP-AES, Varian 730ES) was used to determine the concentrations of the various metal species. The chemical state of the nanocatalyst was identified using an X-Ray photoelectron spectroscope (XPS, AXIS-His) with the Al K $\alpha$  X-ray source. The magnetic property was investigated using a vibrating-sample magnetometer (VSM-7410). Finally, the results of the catalytic reactions were analyzed using a gas chromatography mass spectrometer (GC-MS) with Agilent technologies 7693 autosampler and ultraviolet-visible spectroscopy (UV-vis).

### **Preparation of h-BN/Pd/Fe<sub>2</sub>O<sub>3</sub> catalyst**

The h-BN/Pd/Fe<sub>2</sub>O<sub>3</sub> catalyst was prepared using a facile and green method. First, 1 g of h-BN was dispersed in 50 mL of deionized (DI) water and subsequently added to K<sub>2</sub>PdCl<sub>4</sub> (50 mg) and K<sub>3</sub>Fe(CN)<sub>6</sub> (50 mg); In next step, the obtained solution was treated for sonication for 15 min. Subsequently, the mixture was vigorously stirred for 12 h at room temperature. After stirring, the product was obtained by centrifugation and washed with DI water. Finally, the product was dried in an oven and annealed at 900 °C for 4 h under Ar and H<sub>2</sub> mixture gas flow to produce the h-BN supported Pd and Fe<sub>2</sub>O<sub>3</sub> NPs catalyst.

### **Catalytic reduction**

In a typical reaction, 20 mL of deionized water was used to dissolve 0.15 mmol NaBH<sub>4</sub>, and 0.1 mmol nitroaromatics was prepared. Next, the h-BN/Pd/Fe<sub>2</sub>O<sub>3</sub> catalyst was directly added to the above system and the ensuing mixture was kept for 20 minutes under an air atmosphere. After the reaction, the h-BN/Pd/Fe<sub>2</sub>O<sub>3</sub> catalyst was separated using a small magnet. GC-MS was applied to measure the yield of the amino aromatic groups. UV-vis was used to recorded the concentration of 4-NP at a wavelength of 400 nm and 4-AP at 300 nm.

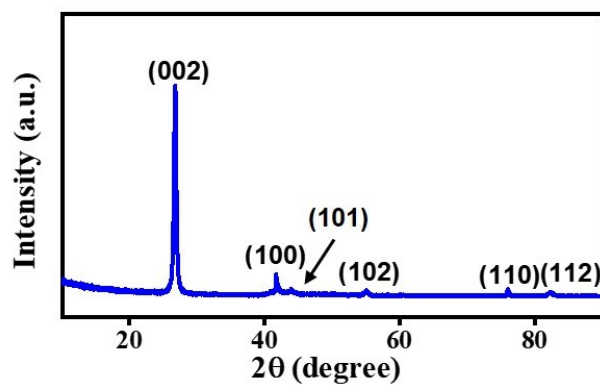

**Figure S1.** XRD pattern of h-BN/Pd/Fe<sub>2</sub>O<sub>3</sub> catalyst.

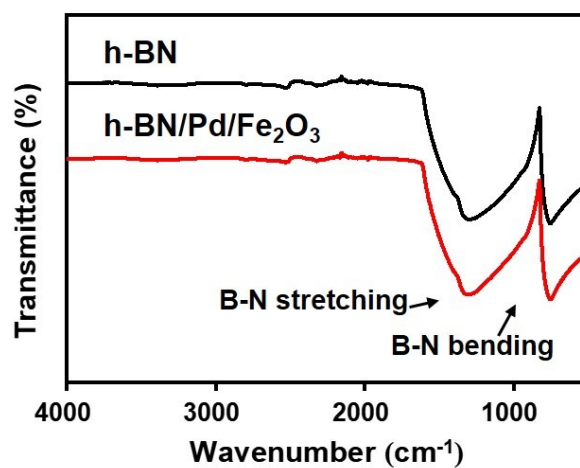

**Figure S2.** FT-IR spectra of h-BN and h-BN/Pd/Fe<sub>2</sub>O<sub>3</sub> catalyst.

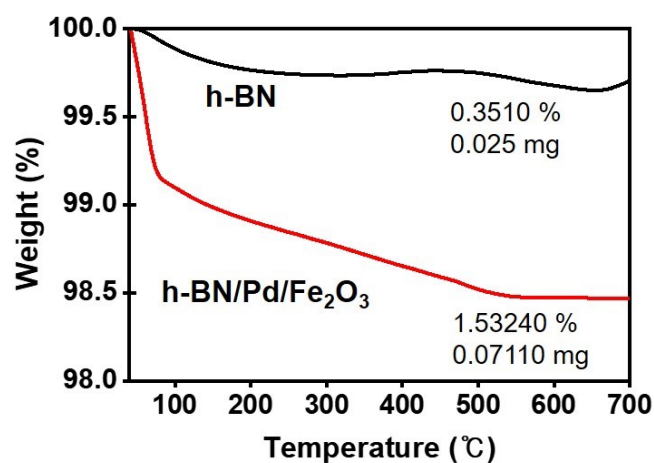

**Figure S3.** TGA curves of h-BN and h-BN/Pd/Fe<sub>2</sub>O<sub>3</sub> catalyst.

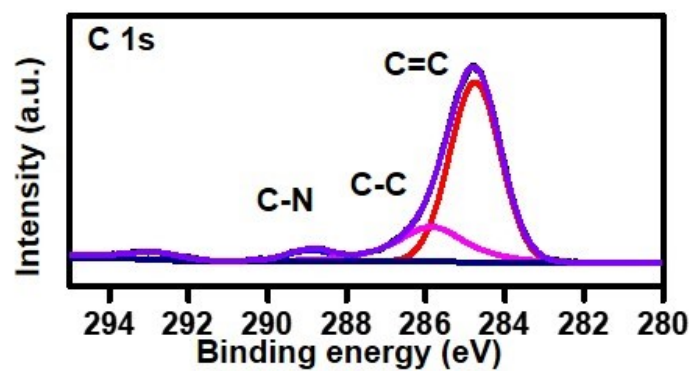

**Figure S4.** XPS spectrum of C 1s.

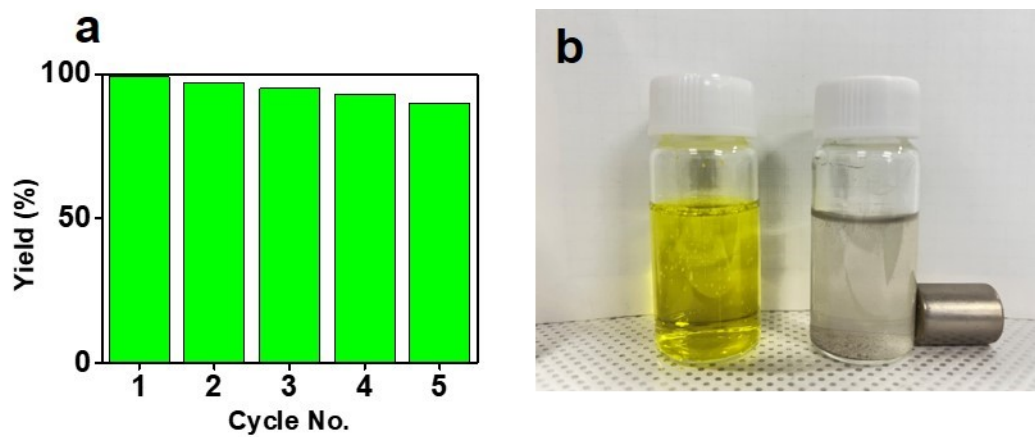

**Figure S5.** (a) Recycling test for the reduction of nitrobenzene to aniline by h-BN/Pd/Fe<sub>2</sub>O<sub>3</sub> catalyst. (b) Digital camera image of before and after magnetic separation for h-BN/Pd/Fe<sub>2</sub>O<sub>3</sub> catalyst in aqueous media.

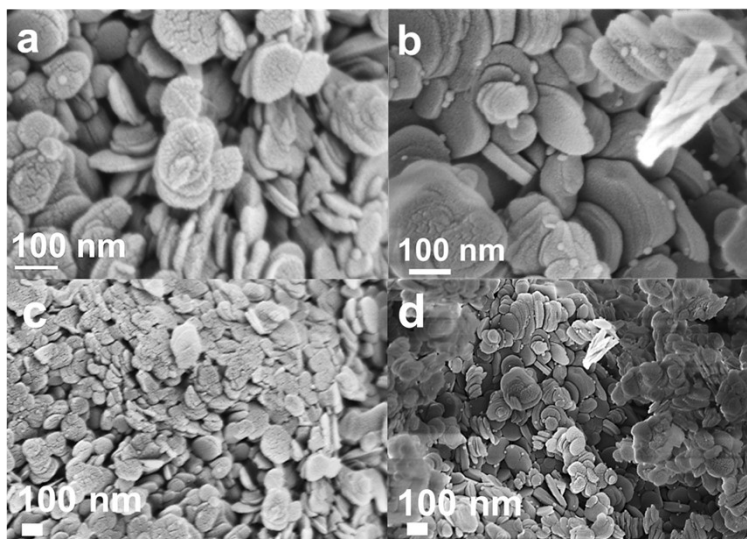

**Figure S6.** (a and c) FESEM images of the as-prepared h-BN/Pd/Fe<sub>2</sub>O<sub>3</sub> catalyst. (b and d) FESEM images of the reused h-BN/Pd/Fe<sub>2</sub>O<sub>3</sub> catalyst after 5<sup>th</sup> cycles.

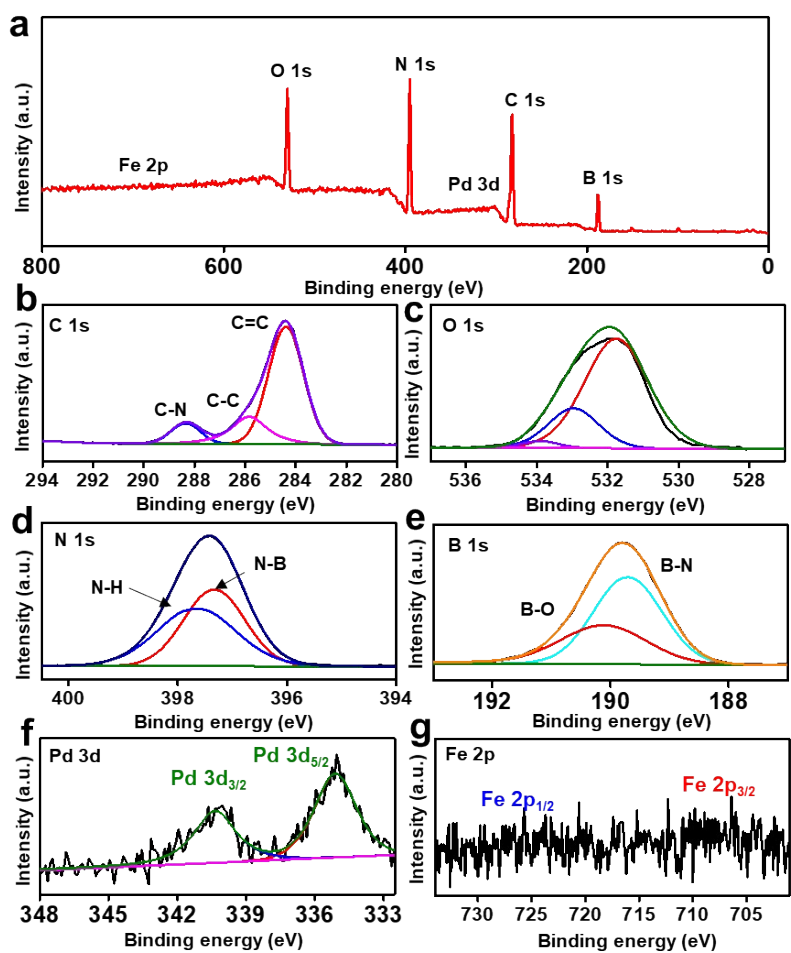

**Figure S7.** XPS pattern (a) survey scan, (b) C 1s, (c) O 1s, (d) N 1s, (e) B 1s, (f) Pd 3d, (g) Fe 2p for the reused h-BN/Pd/Fe<sub>2</sub>O<sub>3</sub> catalyst after 5<sup>th</sup> cycles.

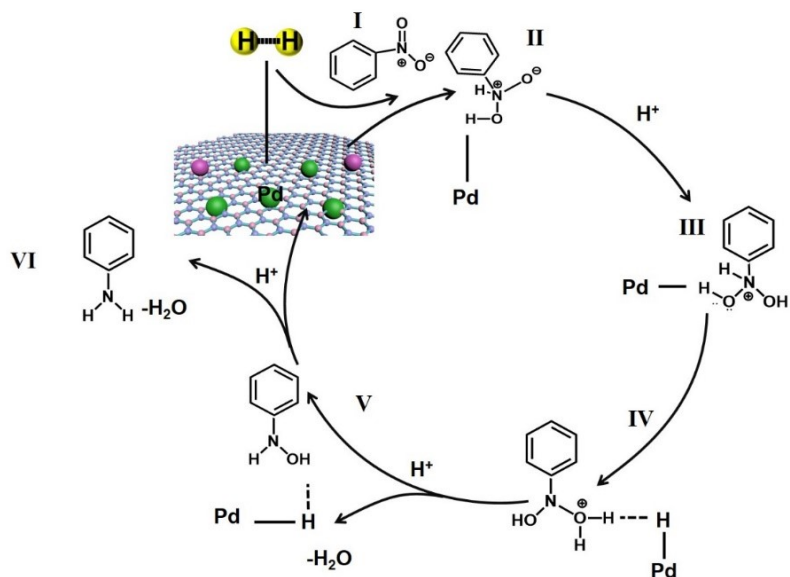

**Scheme S1.** Proposed catalytic hydrogenation mechanism and possible reaction pathways for nitrobenzene reduction with NaBH<sub>4</sub> in the presence of h-BN/Pd/Fe<sub>2</sub>O<sub>3</sub> catalyst.

**Table S1.** Surface area and pore volume of h-BN, BN/Pd/Fe<sub>2</sub>O<sub>3</sub>, h-BN/Pd, and h-BN/Fe<sub>2</sub>O<sub>3</sub>.

| Sample                                 | BET Surface Area/m <sup>2</sup> g <sup>-1</sup> | Pore Volume/cm <sup>3</sup> g <sup>-1</sup> |
|----------------------------------------|-------------------------------------------------|---------------------------------------------|
| h-BN                                   | 32.99                                           | 0.3225                                      |
| h-BN/Pd/Fe <sub>2</sub> O <sub>3</sub> | 56.073                                          | 0.6837                                      |
| h-BN/Pd                                | 29.411                                          | 0.3754                                      |
| h-BN/Fe <sub>2</sub> O <sub>3</sub>    | 16.969                                          | 0.1877                                      |



**Table S2.** Catalytic performance comparison of selected examples of previously published heterogeneous precious metals catalysts utilized in the reduction of nitrobenzene.

| Entry | Catalyst                                                  | Reaction conditions                                        | Yield (%) | Refs. |
|-------|-----------------------------------------------------------|------------------------------------------------------------|-----------|-------|
| 1     | Fe <sub>3</sub> O <sub>4</sub> @Fritillaria/Pd (0.1 mol%) | Hydrazine, EtOH:H <sub>2</sub> O (2:1), 80 °C, 30 min      | 98        | S1    |
| 2     | Fe <sub>3</sub> O <sub>4</sub> @C/Pd (40 mg)              | NaBH <sub>4</sub> , EtOH, (60 ml), 60 °C, 1 h              | 99        | S2    |
| 3     | HAP-Pd (1 mol%)                                           | NaBH <sub>4</sub> , H <sub>2</sub> O, r.t, 2 h             | 99        | S3    |
| 4     | TiO <sub>2</sub> @Au (100 mg)                             | Citric acid, H <sub>2</sub> O, 60 °C, 720s                 | 93        | S4    |
| 5     | SBA-Pr-3AP@Pd (0.03 g)                                    | NaBH <sub>4</sub> , EtOH:H <sub>2</sub> O (1:1) r.t, 4 min | 95        | S5    |
| 6     | Au@ZP(AEP) (1 mol%)                                       | NaBH <sub>4</sub> , EtOH, 30 °C, 4 h                       | 94        | S6    |
| 7     | Au@SBA15 (2 mol%)                                         | NaBH <sub>4</sub> , EtOH 30 °C, 4 h .                      | 92        | S7    |
| 8     | Bento-crt@Pd (0.1 mol%)                                   | NaBH <sub>4</sub> , H <sub>2</sub> O/EtOH r.t, 30 min      | 99        | S8    |
| 9     | Ru-PPT (0.15 mol%)                                        | NaBH <sub>4</sub> , H <sub>2</sub> O/THF r.t, 1 h          | 99        | S9    |
| 10    | n-CeO <sub>2</sub> (9 mol%)                               | Hydrazine, H <sub>2</sub> O, 80 °C, 8 h                    | 99        | S10   |

**Table S3.** ICP analyses for the as-prepared h-BN/Pd/Fe<sub>2</sub>O<sub>3</sub> and the reused h-BN/Pd/Fe<sub>2</sub>O<sub>3</sub> catalyst after 5<sup>th</sup> cycle.

| Element | As-prepared h-BN/Pd/Fe <sub>2</sub> O <sub>3</sub> (mg/L) | 5th cycled h-BN/Pd/Fe <sub>2</sub> O <sub>3</sub> (mg/L) |
|---------|-----------------------------------------------------------|----------------------------------------------------------|
| Fe      | 96.639                                                    | 38.132                                                   |
| Pd      | 114.169                                                   | 86.575                                                   |

## References

- S1. H. Veisi et al., Bio-inspired synthesis of palladium nanoparticles fabricated magnetic Fe<sub>3</sub>O<sub>4</sub> nanocomposite over *Fritillaria imperialis* flower extract as an efficient recyclable catalyst for the reduction of nitroarenes. *Sci. Rep.* 11, 4515 (2021).

- S2. N. Mei, B. Liu, Pd nanoparticles supported on Fe<sub>3</sub>O<sub>4</sub>@C: An effective heterogeneous catalyst for the transfer hydrogenation of nitro compounds into amines. *Int. J. Hydrogen Energy* 41, 17960-17966 (2016).
- S3. M. Shokouhimehr, S. M. G. Yek, M. Nasrollahzadeh, A. Kim, and R.S. Varma, Palladium nanocatalysts on hydroxyapatite: Green oxidation of alcohols and reduction of nitroarenes in water, *Applied Sciences*, 9, 19 (2019).
- S4. M. Rocha, C. Pereira, and C. Freire, Au/Ag nanoparticles-decorated TiO<sub>2</sub> with enhanced catalytic activity for nitroarenes reduction, *Colloids and Surfaces A: Physicochemical and Engineering Aspects*, 621, 2021 (126614).
- S5. F. Mohajer, G. Mohammadi Ziarani, A. Badiei, R. S. Varma, Functionalized silica nanoporous Pd complex for reduction of nitroarenes and dyes, *Inorg. Chem. Commun.* 144, 109936 (2022).
- S6. F. Ferlin, M. Cappelletti, R. Vivani, M. Pica, O. Piermatti, and L. Vaccaro, Au@zirconium-phosphonate nanoparticles as an effective catalytic system for the chemoselective and switchable reduction of nitroarenes, *Green Chemistry*, 21 pp. 614-626 (2019).
- S7. F. Ferlin, T. Giannoni, A. Zuliani, O. Piermatti, R. Luque, and L. Vaccaro, Sustainable Protocol for the Reduction of Nitroarenes by Heterogeneous Au@SBA-15 with NaBH<sub>4</sub> under Flow Conditions, *ChemSusChem*, 12, 3178-3184 (2019).

- S8. M. Gholinejad, Z. Rasouli, C. Najera, and J. M. Sansano, Palladium Nanoparticles on a Creatine-Modified Bentonite Support: An Efficient and Sustainable Catalyst for Nitroarene Reduction, *ChemPlusChem*, 84, 1122-1129 (2019).
- S9. X. Cai et al., Phosphorus-rich network polymer supported ruthenium nanoparticles for nitroarene reduction, *Materials Letters*, 240, 80-83 (2019).
- S10. N. Anbu, C. Vijayan, A. Dhakshinamoorthy, A Versatile, Mild and Selective Reduction of Nitroarenes to Aminoarenes Catalyzed by CeO<sub>2</sub> Nanoparticles with Hydrazine Hydrate, *ChemistrySelect* 4, 1379-1386 (2019).
